# Supplementary material for: Consistent changes in the intestinal microbiota of Atlantic salmon fed insect meal diets
Source: Anim Microbiome. 2022 Jan 10;4:8. doi: 10.1186/s42523-021-00159-4 (PMC8750867; doi:10.1186/s42523-021-00159-4)
Supplement: Supplementary file 1 — Additional file 1. Table S1: Contaminating ASVs removed from the feature table. The primary contaminating ASVs were classified as Pseudomonas, Halomonas, Shewanella algae, Undibacterium, Bradyrhizobium, Ralstonia, Chitinophagaceae, Sediminibacterium, Curvibacter, Afipia, and Cutibacterium. [file 42523_2021_159_MOESM1_ESM.csv]

FeatureID	Taxonomy	Extraction-blank01	Extraction-blank02	Extraction-blank03	Extraction-blank04	Extraction-blank05	Extraction-blank06	Extraction-blank07	Extraction-blank08	Extraction-blank09	Extraction-blank10	Extraction-blank11	Extraction-blank12	Extraction-blank13	PCR-blank1a	PCR-blank1b	PCR-blank1c	PCR-blank2a	PCR-blank2b	PCR-blank2c	PCR-blank3a	PCR-blank3b
ATTGAACGCTGGCGGCAGGCCTAACACATGCAAGTCGAGCGGTAGAGAGAAGCTTGCTTCTCTTGAGAGCGGCGGACGGGTGAGTAATGCCTAGGAATCTGCCTGGTAGTGGGGGATAACGTTCGGAAACGGACGCTAATACCGCATACGTCCTACGGGAGAAAGCAGGGGACCTTCGGGCCTTGCGCTATCAGATGAGCCTAGGTCGGATTAGCTAGTTGGTGAGGTAATGGCTCACCAAGGCGACGATCCGTAACTGGTCTGAGAGGATGATCAGTCACACTGGAACTGAGACACGGTCCAG	k__Bacteria; p__Proteobacteria; c__Gammaproteobacteria; o__Pseudomonadales; f__Pseudomonadaceae; g__Pseudomonas; NA	0.319402048326819	0.301265248512955	0.296760372668297	0.274457942797377	0.306289441689021	0.292658272743394	0.268576514801873	0.287434942123375	0.380494853189335	0.325646008045272	0.270503751339764	0.282188212308694	0	0.293137057996527	0.343166642876402	0.363755341880342	0	0	0	0	0
ATTGAACGCTGGCGGCAGGCCTAACACATGCAAGTCGAGCGGCAGCACGGGGAGCTTGCTCCCTGGTGGCGAGCGGCGGACGGGTGAGTAATGCATAGGAATCTGCCCGGTAGTGGGGGATAACCTGGGGAAACCCAGGCTAATACCGCATACGCCCTACGGGGGAAAGCGGGGGACCTTCGGGCCTCGCGCTATCGGATGAGCCTATGTCGGATTAGCTGGTTGGTGAGGTAACGGCTCACCAAGGCGACGATCCGTAGCTGGTCTGAGAGGATGATCAGCCACACTGGGACTGAGACACGGCCCAG	k__Bacteria; p__Proteobacteria; c__Gammaproteobacteria; o__Oceanospirillales; f__Halomonadaceae; g__Halomonas; NA	0.208812369839957	0.239010989010989	0.264202421131343	0.219266663984875	0.214311905359245	0.256206774250754	0.224912639282653	0.214584340604647	0.170667397907526	0.212228131178837	0.278435155412647	0.185203516769782	0	0.175891686258757	0.217538183375363	0.183707264957265	0	0	0	0	0
ATTGAACGCTGGCGGCAGGCCTAACACATGCAAGTCGAGCGGTAACATTTCAAAAGCTTGCTTTTGAAGATGACGAGCGGCGGACGGGTGAGTAATGCCTGGGAATTTGCCCATTTGTGGGGGATAACAGTTGGAAACGACTGCTAATACCGCATACGCCCTACGGGGGAAAGCAGGGGACCTTCGGGCCTTGCGCTGATGGATAAGCCCAGGTGGGATTAGCTAGTAGGTGAGGTAAAGGCTCACCTAGGCGACGATCCCTAGCTGGTCTGAGAGGATGATCAGCCACACTGGGACTGAGACACGGCCCAG	k__Bacteria; p__Proteobacteria; c__Gammaproteobacteria; o__Alteromonadales; f__Shewanellaceae; g__Shewanella; s__Shewanella algae	0.161883433657604	0.144697046073193	0.143378266405287	0.137063035520335	0.165216048787078	0.184066323816279	0.163240917782027	0.128565740451068	0.165214731690854	0.165354196495534	0.135927116827438	0.161237381960274	0	0.223113547487684	0.119998096778798	0.180849358974359	0	0	0	0	0
ATTGAACGCTGGCGGCATGCCTTACACATGCAAGTCGAACGGCAGCACGGACTTCGGTCTGGTGGCGAGTGGCGAACGGGTGAGTAATATATCGGAACATACCCAGTAGTGGGGGATAACTATCCGAAAGGATAGCTAATACCGCATACGATCTGTGGATGAAAGCAGGGGATCTTCGGACCTTGTGCTATTGGAATGGCCGATATCTGATTAGCTAGTTGGTAGGGTAAAAGCCTACCAAGGCGACGATCAGTAGCTGGTCTGAGAGGACGACCAGCCACACTGGAACTGAGACACGGTCCAG	k__Bacteria; p__Proteobacteria; c__Gammaproteobacteria; o__Betaproteobacteriales; f__Burkholderiaceae; g__Undibacterium; NA	0	0	0	0	0	0	0	0	0.000506243671954101	0	0	0	0	0	0	0	0	0	0	0.182254196642686	0.148532332818362
ATTGAACGCTGGCGGCAGGCCTAACACATGCAAGTCGAGCGGTAACAGATCCAGCTTGCTGGATGCTGACGAGCGGCGGACGGGTGAGTAATGCATAGGAATCTGCCCGATAGTGGGGGATAACCTGGGGAAACCCAGGCTAATACCGCATACGTCCTACGGGAGAAAGGGGGCTCCGGCTCCCGCTATTGGATGAGCCTATGTCGGATTAGCTAGTTGGTGAGGTAACGGCTCACCAAGGCCACGATCCGTAGCTGGTCTGAGAGGATGATCAGCCACATCGGGACTGAGACACGGCCCGA	k__Bacteria; p__Proteobacteria; c__Gammaproteobacteria; o__Oceanospirillales; f__Halomonadaceae; g__Halomonas; NA	0.0756711265797507	0.0432503276539974	0.0429963016107193	0.0886700993603926	0.0530134897813459	0.0361145593190282	0.0736714577701589	0.0781974346577174	0.0761896726290921	0.0514249676143724	0.0763129689174705	0.0862911103874959	0	0.0689838498162872	0.0637579102631203	0.0642628205128205	0	0	0	0	0
ATTGAACGCTGGCGGCAGGCCTAACACATGCAAGTCGAGCGGTAACAGATCTAGCTTGCTAGATGCTGACGAGCGGCGGACGGGTGAGTAATGCATAGGAATCTGCCCGATAGTGGGGGATAACCTGGGGAAACCCAGGCTAATACCGCATACGTCCTACGGGAGAAAGGGGGCTCCGGCTCCCGCTATGGGATGAGCCTATGTCGGATTAGCTAGTTGGTGAGGTAACGGCTCACCAAGGCGACGATCCGTAGCTGGTCTGAGAGGATGATCAGCCACATCGGGACTGAGACACGGCCCGA	k__Bacteria; p__Proteobacteria; c__Gammaproteobacteria; o__Oceanospirillales; f__Halomonadaceae; g__Halomonas; NA	0.0478133112715032	0.06177538058272	0.0549806996624967	0.0495092320688684	0.0660208039832487	0.0491221847845363	0.0347217643568273	0.0575637780495435	0.0406998818764765	0.0432774255130565	0.0548553054662379	0.0745815695213286	0	0.0553973748567513	0.086311081505448	0.0497863247863248	0	0	0	0	0
ATTGAACGCTGGCGGCAGGCCTAACACATGCAAGTCGAGCGGTAACAGATCTAGCTTGCTGGATGCTGACGAGCGGCGGACGGGTGAGTAATGCATAGGAATCTGCCCGATAGTGGGGGATAACCTGGGGAAACCCAGGCTAATACCGCATACGTCCTACGGGAGAAAGGGGGCTCCGGCTCCCGCTATGGGATGAGCCTATGTCGGATTAGCTAGTTGGTGAGGTAACGGCTCACCAAGGCGACGATCCGTAGCTGGTCTGAGAGGATGATCAGCCACATCGGGACTGAGACACGGCCCGA	k__Bacteria; p__Proteobacteria; c__Gammaproteobacteria; o__Oceanospirillales; f__Halomonadaceae; g__Halomonas; NA	0.0280575129090235	0.0307616695231374	0.0303752955679958	0.0314071362484412	0.0298743655557057	0.0261925873381805	0.0327190611195358	0.0513352862546572	0.0422397063786703	0.0346185313970137	0.0201286173633441	0.0308173233474438	0	0.022636248715192	0.0426162947455235	0.0191239316239316	0	0	0	0	0
ATTGAACGCTGGCGGCAGGCCTAACACATGCAAGTCGAGCGGTAACAGATCCAGCTTGCTGGATGCTGACGAGCGGCGGACGGGTGAGTAATGCATAGGAATCTGCCCGGTAGTGGGGGATAACCTGGGGAAACCCAGGCTAATACCGCATACGTCCTACGGGAGAAAGGGGGCTCCGGCTCCCGCTATCGGATGAGCCTATGTCGGATTAGCTAGTTGGTGAGGTAACGGCTCACCAAGGCCACGATCCGTAGCTGGTCTGAGAGGATGATCAGCCACATCGGGACTGAGACACGGCCCGA	k__Bacteria; p__Proteobacteria; c__Gammaproteobacteria; o__Oceanospirillales; f__Halomonadaceae; g__Halomonas; NA	0.0276438535931304	0.0265903820949693	0.0304662395667024	0.0272637676495434	0.0115792114556999	0.0323284270260685	0.0387766202940595	0.0121014760672336	0.0203341208234897	0.0159882729937956	0.0252947481243301	0.0488049495278411	0	0.0416336850064388	0.0214270986978795	0.036698717948718	0	0	0	0	0
ATTGAACGCTGGCGGCAGGCCTAACACATGCAAGTCGAGCGGTAACATTTCAAAAGCTTGCTTTTGAAGATGACGAGCGGCGGACGGGTGAGTAATGCCTGGGAATTTGCCCATTTGTGGGGGATAACAGTTGGAAACGACTGCTAATACCGCATACGCCCTACGGGGGAAAGCAGGGGAACTTCGGTCCTTGCGCTGATGGATAAGCCCAGGTGGGATTAGCTAGTAGGTGAGGTAATGGCTCACCTAGGCAACGATCCCTAGCTGGTCTGAGAGGATGATCAGCCACACTGGGACTGAGACACGGCCCAG	k__Bacteria; p__Proteobacteria; c__Gammaproteobacteria; o__Alteromonadales; f__Shewanellaceae; g__Shewanella; s__Shewanella algae	0.0192280261318575	0.0291360016130658	0.0350942786119925	0.0194195261273583	0.0220005017658297	0.0256960453981202	0.0233978374101668	0.0428031057137169	0.0156302733715829	0.0393400149996591	0.0226366559485531	0.0250862911103875	0	0.028141724655317	0.0378741019174954	0.0383547008547009	0	0	0	0	0
AGCGAACGCTGGCGGCAGGCTTAACACATGCAAGTCGAGCGGGCATAGCAATATGTCAGCGGCAGACGGGTGAGTAACGCGTGGGAACGTACCTTTTGGTTCGGAACAACACAGGGAAACTTGTGCTAATACCGGATAAGCCCTTACGGGGAAAGATTTATCGCCGAAAGATCGGCCCGCGTCTGATTAGCTAGTTGGTGAGGTAATGGCTCACCAAGGCGACGATCAGTAGCTGGTCTGAGAGGATGATCAGCCACATTGGGACTGAGACACGGCCCAA	k__Bacteria; p__Proteobacteria; c__Alphaproteobacteria; o__Rhizobiales; f__Xanthobacteraceae; g__Bradyrhizobium; NA	0	0	0	0	0	0	0	0	0	0	0	0	0	0	0	0	0	0	0	0	0.0337673802692562
ATTGAACGCTGGCGGCATGCCTTACACATGCAAGTCGAACGGCAGCATGATCTAGCTTGCTAGATTGATGGCGAGTGGCGAACGGGTGAGTAATACATCGGAACGTGCCCTGTAGTGGGGGATAACTAGTCGAAAGATTAGCTAATACCGCATACGACCTGAGGGTGAAAGTGGGGGACCGCAAGGCCTCATGCTATAGGAGCGGCCGATGTCTGATTAGCTAGTTGGTGAGGTAAAGGCTCACCAAGGCGACGATCAGTAGCTGGTCTGAGAGGACGATCAGCCACACTGGGACTGAGACACGGCCCAG	k__Bacteria; p__Proteobacteria; c__Gammaproteobacteria; o__Betaproteobacteriales; f__Burkholderiaceae; g__Ralstonia; s__uncultured Ralstonia sp.	0.0262744986163809	0	0.00661870212808957	0.0201838368397763	0.0269988613775402	0.00101968434119525	0	0.00034128722163761	0	0.00412490625213063	0.0310396570203644	0.00867469879518072	0	0.0062615928074383	0.000428224770423943	0.00555555555555556	0	0	0	0.00863309352517986	0.0218494813506952
GATGAACGCTAGCGGCAGGCTTAATACATGCAAGTCGAGGGGCAGCAGCTTTATAGCAATATAGAGGCTGGCGACCGGCAAACGGGTGCGGAACACGTACACAACCTTCCTTGAATAGGGGGATAGCCCATAGAAATGTGGATTAATACCCCGTAATATAGCGGTGTGGCATCACACTGTTATTATAGTTTCGGCGATTCGAGATGGGTGTGCGGCTGATTAGGTAGTTGGCGGGGTAAAGGCCCACCAAGCCTTCGATCAGTAGCTGATGTGAGAGCATGATCAGCCACACGGGCACTGAGACACGGGCCCG	k__Bacteria; p__Bacteroidetes; c__Bacteroidia; o__Chitinophagales; f__Chitinophagaceae; NA; NA	0	0	0	0	0	0	0	0	0	0	0	0	0	0	0	0	0	0	0	0.0298561151079137	0
ATTGAACGCTGGCGGCATGCCTTACACATGCAAGTCGAACGGCAGCATGATCTAGCTTGCTAGATTGATGGCGAGTGGCGAACGGGTGAGTAATACATCGGAACGTGCCCTGTAGTGGGGGATAACTAGTCGAAAGATTAGCTAATACCGCATACGACCTGAGGGTGAAAGTGGGGGACCGCAAGGCCTCATGCTATAGGAGCGGCCGATGTCTGATTAGCTAGTTGGTGGGGTAAAGGCCCACCAAGGCGACGATCAGTAGCTGGTCTGAGAGGACGATCAGCCACACTGGGACTGAGACACGGCCCAG	k__Bacteria; p__Proteobacteria; c__Gammaproteobacteria; o__Betaproteobacteriales; f__Burkholderiaceae; g__Ralstonia; NA	0	0	0	0	0	0	0	0	0	0	0	0	0	0	0	0	0	0	0	0	0.0295740454645774
GATGAACGCTAGCGGCAGGCTTAATACATGCAAGTCGTGGGGCAGCGCAGTGTAGCAATACATGGGCGGCGACCGGCAAACGGGTGCGGAACACGTACACAACCTTCCTACAAGTGGGGAATAGCCCAGAGAAATTTGGATTAATACCCCGTAACATATAAAGATGGCATCATTTTTATATTATAGCTACGGCGCTTGTTGATGGGTGTGCGGCTGATTAGGTAGTTGGCGGGGTAATGGCCCACCAAGCCTGCGATCAGTAGCTGATGTGAGAGCATGATCAGCCACACGGGCACTGAGACACGGGCCCG	k__Bacteria; p__Bacteroidetes; c__Bacteroidia; o__Chitinophagales; f__Chitinophagaceae; g__Sediminibacterium; NA	0	0	0	0	0	0	0	0	0	0	0	0	0	0	0	0	0	0	0	0.00551558752997602	0.0236150960052968
ATTGAACGCTGGCGGCATGCCTTACACATGCAAGTCGAACGGCAGCACGGGAGCAATCCTGGTGGCGAGTGGCGAACGGGTGAGTAAAGTATCGGAACGTGCCCAGTCGTGGGGGATAACGTAGCGAAAGTTACGCTAATACCGCATACGATCTATGGATGAAAGCGGGGGATCGCAAGACCTCGCGCGATTGGAGCGGCCGATATCAGATTAGGTAGTTGGTGGGGTAAAGGCCCACCAAGCCGACGATCTGTAGCTGGTCTGAGAGGACGACCAGCCACACTGGGACTGAGACACGGCCCAG	k__Bacteria; p__Proteobacteria; c__Gammaproteobacteria; o__Betaproteobacteriales; f__Burkholderiaceae; g__Curvibacter; NA	0	0	0	0	0	0	0	0	0	0	0	0	0	0	0	0	0	0	0	0.013189448441247	0.022732288677996
AGCGAACGCTGGCGGCAGGCTTAACACATGCAAGTCGAGCGGGCGTAGCAATACGTCAGCGGCAGACGGGTGAGTAACACGTGGGAACGTACCTTTTGGTTCGGAACAACTGAGGGAAACTTCAGCTAATACCGGATAAGCCCTAACGGGGAAAGATTTATCGCCGAAAGATCGGCCCGCGTCTGATTAGCTAGTTGGTGAGGTAATGGCTCACCAAGGCGACGATCAGTAGCTGGTCTGAGAGGATGATCAGCCACACTGGGACTGAGACACGGCCCAG	k__Bacteria; p__Proteobacteria; c__Alphaproteobacteria; o__Rhizobiales; f__Xanthobacteraceae; g__Afipia; Ambiguous_taxa	0	0	0	0	0	0	0	0	0	0	0	0	0	0	0	0	0	0	0	0	0.0110350915912602
GACGAACGCTGGCGGCGTGCTTAACACATGCAAGTCGAACGGAAAGGCCCTGCTTTTGTGGGGTGCTCGAGTGGCGAACGGGTGAGTAACACGTGAGTAACCTGCCCTTGACTTTGGGATAACTTCAGGAAACTGGGGCTAATACCGGATAGGAGCTCCTGCTGCATGGTGGGGGTTGGAAAGTTTCGGCGGTTGGGGATGGACTCGCGGCTTATCAGCTTGTTGGTGGGGTAGTGGCTTACCAAGGCTTTGACGGGTAGCCGGCCTGAGAGGGTGACCGGCCACATTGGGACTGAGATACGGCCCAG	k__Bacteria; p__Actinobacteria; c__Actinobacteria; o__Propionibacteriales; f__Propionibacteriaceae; g__Cutibacterium; NA	0.00134082674806721	0	0	0	0	0	0.00913166743588053	0.00275873837490401	0.00504134323320958	0	0	0	0	0.00401687085760193	0	0	0	0	0	0	0.0101522842639594
GATGAACGCTAGCGGCAGGCTTAATACATGCAAGTCGAGGGACAGCACAGGTAGCAATACTGGGTGGTAACCGGCAAACGGGTGCGGAACACGTACACAACCTTCCTTTAAGTGGGGGATAGCCCAGAGAAATTTGGATTAATACCCCGTAATATAGTTGAATGGCATCATTTGACTATTATAGCTACGGCGCTTAATGATGGGTGTGCGGCTGATTAGATAGTTGGCGGGGTAACGGCCCACCAAGTCTACGATCAGTAGCTGATGTGAGAGCATGATCAGCCACACGGGCACTGAGACACGGGCCCG	k__Bacteria; p__Bacteroidetes; c__Bacteroidia; o__Chitinophagales; f__Chitinophagaceae; g__Sediminibacterium; s__uncultured bacterium	0	0	0	0	0	0	0	0	0	0	0	0	0	0	0	0	0	0	0	0.00839328537170264	0
ATTGAACGCTGGCGGCAGGCCTAACACATGCAAGTCGAGCGGCAGCACGGGGAGCTTGCTCCCTGGTGGCGAGCGGCGGACGGGTGAGTAATGCATAGGAATCTGCCCGGTAGTGGGGGATAACCTGGGGAAACCCAGGCTAATACCGCATACGCCCTACGGGGGAAAGCGGGGGACCTTCGGGCCTCGCGCTATCGGATGAGCCTATGTCGGATTAGCTGGTTGGTGAGGTAACGGCTCACCAAGGCGACGATCCGTAGCTGGTCTGAGGGGATGATCAGCCACACTGGGACTGAGACACGGCCCAG	k__Bacteria; p__Proteobacteria; c__Gammaproteobacteria; o__Oceanospirillales; f__Halomonadaceae; g__Halomonas; NA	0.00643311556785439	0.00698155055953221	0.00756856167013601	0.00605414537994288	0.00582820309936893	0.00691611987941124	0.00635425595041867	0.00534683313898922	0.00486204859939251	0.00542033135610554	0.00797427652733119	0.00511885379355259	0	0.00489113098543294	0.00610616802271177	0.0046207264957265	0	0	0	0	0
AACGAACGCTGGCGGCGTGCTTAACACATGCAAGTCGAACGTGATCCAGTCCTTCGGGTCTGGTGAAAGTGGCGCACGGGTGAGTAACACGTGGATAATCTGCCCGGTGATCAGGGATAACTCTTCGAAAGGGGAGCTAATACCGGATAAGCCCACGAGCTCCTCGGAGCTTGCGGGAAAAGGTGGGGACCTTCGGGCCTGCCGTCATCGGATGAGTCCGCGGCCCATTAGCTAGTTGGTGGGGTAATGGCCCACCAAGGCTACGATGGGTAGCTGGTCTGAGAGGATGATCAGCCACACTGGAACTGAGACACGGTCCAG	k__Bacteria; p__Proteobacteria; c__Deltaproteobacteria; o__Desulfuromonadales; f__Desulfuromonadaceae; g__Pelobacter; s__uncultured bacterium	0	0	0.00771003011256846	0	0	0	0	0.00331333011006513	0	0	0	0	0	0.00421771440048202	0	0	0	0	0	0	0
AGCGAACGCTGGCGGCAGGCTTAACACATGCAAGTCGAGCGGGCGTAGCAATACGTCAGCGGCAGACGGGTGAGTAACGCGTGGGAACGTACCTTTTGGTTCGGAACAACACAGGGAAACTTGTGCTAATACCGGATAAGCCCTTACGGGGAAAGATTTATCGCCGAAAGATCGGCCCGCGTCTGATTAGCTAGTTGGTAGGGTAATGGCCTACCAAGGCGACGATCAGTAGCTGGTCTGAGAGGATGATCAGCCACATTGGGACTGAGACACGGCCCAA	k__Bacteria; p__Proteobacteria; c__Alphaproteobacteria; o__Rhizobiales; f__Xanthobacteraceae; g__Bradyrhizobium; NA	0	0	0	0	0	0	0	0	0	0	0	0	0	0	0	0	0	0.00731382978723404	0	0	0
ATTGAACGCTGGCGGCAGGCCTAACACATGCAAGTCGAGCGGCAGCACGGGGAGCTTGCTCCCTGGTGGCGAGCGGCGGACGGGTGAGTAATGCATAGGAATCTGCCCGGTAGTGGGGGATAACCTGGGGAAACCCAGGCTAATACCGCATACGCCCTACGGGGGAAAGCGGGGGACCTTCGGGACTCGCGCTATCGGATGAGCCTATGTCGGATTAGCTGGTTGGTGAGGTAACGGCTCACCAAGGCGACGATCCGTAGCTGGTCTGAGAGGATGATCAGCCACACTGGGACTGAGACACGGCCCAG	k__Bacteria; p__Proteobacteria; c__Gammaproteobacteria; o__Oceanospirillales; f__Halomonadaceae; g__Halomonas; NA	0	0.00642705917935276	0	0	0	0	0	0	0	0	0	0	0	0	0	0	0	0	0	0	0
ATTGAACGCTGGCGGCAGGCCTAACACATGCAAGTCGAGCGGTAACATTTCAAAAGCTTGCTTTTGAAGATGACGAGCGGCGGACGGGTGAGTAATGCCTGGGAATTTGCCCATTTGTGGGGGATAACAGTTGGAAACGACTGCTAATACCGCATACGCCCTACGGGGGAAAGCAGGGGACCTTCGGGCCTTGCGCTGATGGATAAGCCCAGGTGGGATTAGCTAGTAGGTGAGGTAAAGGCTCACCTAGGCGACGATCCCTAGCTGGTCTGAGGGGATGATCAGCCACACTGGGACTGAGACACGGCCCAG	k__Bacteria; p__Proteobacteria; c__Gammaproteobacteria; o__Alteromonadales; f__Shewanellaceae; g__Shewanella; s__Shewanella algae	0.00484979887598779	0.00394445004536748	0.00428447282795416	0.00375115652278853	0.00403342532373545	0.00515162262812555	0.00529933408056966	0.00396746395153721	0.0051573574080324	0.00449989772959705	0.00387995712754555	0.00427222403126018	0	0.006379736067956	0.00331477692661496	0.00531517094017094	0	0	0	0	0
ATTGAACGCTGGCGGCATGCCTTACACATGCAAGTCGAACGGTAACAGGTTAAGCTGACGAGTGGCGAACGGGTGAGTAATATATCGGAACGTGCCCAGTCGTGGGGGATAACTGCTCGAAAGAGCAGCTAATACCGCATACGACCTGAGGGTGAAAGCGGGGGATCGCAAGACCTCGCGCGATTGGAGCGGCCGATATCAGATTAGGTAGTTGGTGGGGTAAAGGCCCACCAAGCCAACGATCTGTAGCTGGTCTGAGAGGACGACCAGCCACACTGGGACTGAGACACGGCCCAG	k__Bacteria; p__Proteobacteria; c__Gammaproteobacteria; o__Betaproteobacteriales; f__Burkholderiaceae; g__Pelomonas; NA	0	0	0.00187950930660253	0	0	0	0	0	0	0	0.00576634512325831	0	0	0	0	0	0	0	0	0	0
ATTGAACGCTGGCGGCATGCTTTACACATGCAAGTCGAACGGTAACAGGTTAAGCTGACGAGTGGCGAACGGGTGAGTAATGCATCGGAACGTGCCCGATCGTGGGGGATAACGCAGCGAAAGCTGCGCTAATACCGCATACGATCTGAGGATGAAAGCGGGGGACCGTAAGGCCTCGCGCGATCGGAGCGGCCGATGTCAGATTAGGTAGTTGGTGGGGTAAAGGCTCACCAAGCCAACGATCTGTAGCTGGTCTGAGAGGACGACCAGCCACACTGGGACTGAGACACGGCCCAG	k__Bacteria; p__Proteobacteria; c__Gammaproteobacteria; o__Betaproteobacteriales; f__Burkholderiaceae; g__Hydrogenophaga; NA	0	0	0	0	0	0	0	0	0	0	0	0	0	0	0	0	0	0	0	0	0.00485544030015449
ATTGAACGCTGGCGGCAGGCTTAACACATGCAAGTCGAGCGGAGTGATGGTGCTTGCACTATCACTTAGCGGCGGACGGGTGAGTAATGCTTAGGAATCTGCCTATTAGTGGGGGACAACATTTCGAAAGGAATGCTAATACCGCATACGTCCTACGGGAGAAAGCAGGGGATCTTCGGACCTTGCGCTAATAGATGAGCCTAAGTCGGATTAGCTAGTTGGTGGGGTAAAGGCCTACCAAGGCGACGATCTGTAGCGGGTCTGAGAGGATGATCCGCCACACTGGGACTGAGACACGGCCCAG	k__Bacteria; p__Proteobacteria; c__Gammaproteobacteria; o__Pseudomonadales; f__Moraxellaceae; g__Acinetobacter; NA	0	0	0	0	0.00432290561012795	0	0	0	0	0	0	0	0	0	0	0	0	0	0	0	0
ATTGAACGCTGGCGGCAGGCCTAACACATGCAAGTCGAGCGGTAACAGATCTAGCTTGCTAGATGCTGACGATCGGCGGACGGGTGAGTAATGCATAGGAATCTGCCCGATAGTGGGGGATAACCTGGGGAAACCCAGGCTAATACCGCATACGTCCTACGGGAGAAAGGGGGCTCCGGCTCCCGCTATGGGATGAGCCTATGTCGGATTAGCTAGTTGGTGAGGTAACGGCTCACCAAGGCGACGATCCGTAGCTGGTCTGAGAGGATGATCAGCCACATCGGGACTGAGACACGGCCCGA	k__Bacteria; p__Proteobacteria; c__Gammaproteobacteria; o__Oceanospirillales; f__Halomonadaceae; g__Halomonas; NA	0.00416512138761304	0.00419649158181268	0	0	0	0	0	0	0	0	0	0	0	0	0	0	0	0	0	0	0
ATTGAACGCTGTCGGCAGGCCTAACACATGCAAGTCGAGCGGTAACATTTCAAAAGCTTGCTTTTGAAGATGACGAGCGGCGGACGGGTGAGTAATGCCTGGGAATTTGCCCATTTGTGGGGGATAACAGTTGGAAACGACTGCTAATACCGCATACGCCCTACGGGGGAAAGCAGGGGACCTTCGGGCCTTGCGCTGATGGATAAGCCCAGGTGGGATTAGCTAGTAGGTGAGGTAAAGGCTCACCTAGGCGACGATCCCTAGCTGGTCTGAGAGGATGATCAGCCACACTGGGACTGAGACACGGCCCAG	k__Bacteria; p__Proteobacteria; c__Gammaproteobacteria; o__Alteromonadales; f__Shewanellaceae; g__Shewanella; s__Shewanella algae	0	0	0	0	0.00119651851708899	0.00105515162262813	0	0.00149313159466454	0	0	0	0	0	0	0.00377472205040364	0	0	0	0	0	0
AACGAACGCTGGCGGCAGGCTTAACACATGCAAGTCGAGCGAGGTCTTCGGGCCTAGCGGCGGACGGGTGAGTAACGCGTGGGAACGTGCCCTTTGCTACGGAATAGCCCCGGGAAACTGGGAGTAATACCGTATGTGCCCTTTGCCCTTGGCGGGTATTGGGGAAAGATTTATCGGCAAAGGATCGGCCCGCGTTGGATTAGGTAGTTGGTGGGGTAATGGCCTACCAAGCCGACGATCCATAGCTGGTTTGAGAGGATGATCAGCCACACTGGGACTGAGACACGGCCCAG	k__Bacteria; p__Proteobacteria; c__Alphaproteobacteria; o__Rhodobacterales; f__Rhodobacteraceae; NA; NA	0	0	0	0	0	0	0.00374167600712072	0	0	0	0	0	0	0	0	0	0	0	0	0	0
ATTGAACGCTGGCGGCAGGCCTAACACATGCAAGTCGAGCGGTAACATTTCAAAAGCTTGCTTTTGAAGATGACGAGCGGCGGACGGGTGAGTAATGCCTGGGAATTTGCCCATTTGTGGGGGATAACAGTTGGAAACGACTGCTAATACCGCATACGCCCTACGGGGGAAAGCAGGGGACCTTCGGGCCTTGCGCTGATGGATAAGCCCAGGTGGGATTAGCTAGTAGGTGAGGTAAAGGCTCACCTAGGCGACGATCCCTAGCTGGTCTGAGAGGATGATCAGCCACACTGGGACTGAGACACGTCCCAG	k__Bacteria; p__Proteobacteria; c__Gammaproteobacteria; o__Alteromonadales; f__Shewanellaceae; g__Shewanella; s__Shewanella algae	0	0	0.00349629150583052	0	0	0	0	0	0	0	0	0	0	0	0	0	0	0	0	0	0
ATTGAACGCTGGCGGCATGCCTTACACATGCAAGTCGAACGGCAGCACGGGTGCTTGCACCTGGTGGCGAGTGGCGAACGGGTGAGTAATACATCGGAACATGTCCTGTAGTGGGGGATAGCCCGGCGAAAGCCGGATTAATACCGCATACGATCTACGGATGAAAGCGGGGGACCTTCGGGCCTCGCGCTATAGGGTTGGCCGATGGCTGATTAGCTAGTTGGTGGGGTAAAGGCCTACCAAGGCGACGATCAGTAGCTGGTCTGAGAGGACGACCAGCCACACTGGGACTGAGACACGGCCCAG	k__Bacteria; p__Proteobacteria; c__Gammaproteobacteria; o__Betaproteobacteriales; f__Burkholderiaceae; g__Burkholderia-Caballeronia-Paraburkholderia; s__uncultured beta proteobacterium	0	0	0	0	0	0	0	0	0	0	0.00336548767416935	0	0	0	0.000618546890612361	0	0	0	0	0	0
ATTGAACGCTGGCGGCATGCCTTACACATGCAAGTCGAACGGCAGCGCGGACTTCGGTCTGGCGGCGAGTGGCGAACGGGTGAGTAATACATCGGAACGTACCCTGTTGTGGGGGATAACTAGTCGAAAGATTAGCTAATACCGCATACGACCTGAGGGTGAAAGTGGGGGACCGCAAGGCCTCACGCAGCAGGAGCGGCCGATGTCTGATTAGCTAGTTGGTGGGGTAAAGGCCCACCAAGGCGACGATCAGTAGCTGGTCTGAGAGGACGATCAGCCACACTGGGACTGAGACACGGCCCAG	k__Bacteria; p__Proteobacteria; c__Gammaproteobacteria; o__Betaproteobacteriales; f__Burkholderiaceae; g__Cupriavidus; NA	0	0	0	0	0	0	0	0	0	0	0	0	0	0.00284725257847666	0	0	0	0	0	0	0
AACGAACGCTGGCGGCATGCCTAACACATGCAAGTCGAACGAGATCTTCGGGTCTAGTGGCGCACGGGTGCGTAACGCGTGGGAATCTGCCCTTTGGTTCGGAATAACAGTTGGAAACGACTGCTAATACCGGATGATGACGAAAGTCCAAAGATTTATCGCCAGAGGATGAGCCCGCGTAGGATTAGCTAGTTGGTGTGGTAAAGGCGCACCAAGGCGACGATCCTTAGCTGGTCTGAGAGGATGATCAGCCACACTGGGACTGAGACACGGCCCAG	k__Bacteria; p__Proteobacteria; c__Alphaproteobacteria; o__Sphingomonadales; f__Sphingomonadaceae; g__Sphingomonas; NA	0	0	0	0	0	0	0	0	0	0	0	0	0	0	0	0	0	0	0	0	0.00264842198190245
ATTGAACGCTGGCGGCAGGCCTAACACATGCAAGTCGAGCGGCAGCACGGGGAGCTTGCTCCCTGGTGGCGAGCGGCGGACGGGTGAGTAATGCATAGGAATCTGCCCGGTAGTGGGGGATAACCTGGGGAAACCCAGGCTAATACCGCATACGCCCTACGGGGGAAAGCGGGGGACCTTCGGGCCTCGCGCTATCGGATGAGCCTATGTCGGATTAGCTGGTTGGTGAGGTAACGGATCACCAAGGCGACGATCCGTAGCTGGTCTGAGAGGATGATCAGCCACACTGGGACTGAGACACGGCCCAG	k__Bacteria; p__Proteobacteria; c__Gammaproteobacteria; o__Oceanospirillales; f__Halomonadaceae; g__Halomonas; NA	0	0	0.00263737596249065	0	0	0	0	0	0	0	0	0	0	0	0	0	0	0	0	0	0
GATGAACGCTAGCGGGAGGCCTAACACATGCAAGCCGAGCGGTATTGTTTCTTCGGAAATGAGAGAGCGGCGTACGGGTGCGGAACACGTGTGCAACCTGCCTTTATCTGGGGGATAGCCTTTCGAAAGGAAGATTAATACTCCATAATATATTGAACGGCATCGTTTAATATTGAAAGCTCCGGCGGATAGAGATGGGCACGCGCAAGATTAGCTAGTTGGTGAGGTAACGGCTCACCAAGGCGATGATCTTTAGGGGGCCTGAGAGGGTGATCCCCCACACTGGTACTGAGACACGGACCAG	k__Bacteria; p__Bacteroidetes; c__Bacteroidia; o__Flavobacteriales; f__Weeksellaceae; g__Cloacibacterium; Ambiguous_taxa	0	0	0	0.00225270525765316	0	0	0	0	0	0	0	0	0	0	0	0	0	0	0	0	0
ATTGAACGCTGGCGGCAGGCCTAACACATGCAAGTCGAGCGGCAGCACAAGGGAATTTACTTCTGAGGTGGCGAGCGGCGGACGGGTGAGTAATGCCTAGGGATCTGCCCAGTCGAGGGGGATAACAGTTGGAAACGACTGCTAATACCGCATACGCCCTACGGGGGAAAGGAGGGGACCTTCGGGCCTTCCGCGATTGGATGAACCTAGGTGGGATTAGCTAGTTGGTGAGGTAATGGCTCACCAAGGCGACGATCCCTAGCTGTTCTGAGAGGATGATCAGCCACACTGGGACTGAGACACGGCCCAG	k__Bacteria; p__Proteobacteria; c__Gammaproteobacteria; o__Alteromonadales; f__Shewanellaceae; g__Shewanella; NA	0	0	0	0	0	0	0	0	0	0.00214767846185314	0	0	0	0	0	0	0	0	0	0	0
ATTGAACGCTGGCGGCAGGCCTAACACATGCAAGTCGAGCGGATGAGAGGAGCTTGCTCCTTGATTTAGCGGCGGACGGGTGAGTAATGCCTAGGAATCTGCCTGGTAGTGGGGGATAACGTCCGGAAACGGGCGCTAATACCGCATACGTCCTACGGGAGAAAGCAGGGGACCTTCGGGCCTTGCGCTATCAGATGAGCCTAGGTCGGATTAGCTAGTTGGTGAGGTAATGGCTCACCAAGGCGACGATCCGTAACTGGTCTGAGAGGATGATCAGTCACACTGGAACTGAGACACGGTCCAG	k__Bacteria; p__Proteobacteria; c__Gammaproteobacteria; o__Pseudomonadales; f__Pseudomonadaceae; g__Pseudomonas; NA	0	0	0	0	0.000675454001582492	0	0	0	0	0	0.00109324758842444	0.00166720937805275	0	0	0	0	0	0	0	0	0
ATTGAACGCTGGCGGCAGGCTTAACACATGCAAGTCGAGCGGAGATGAGGTGCTTGCACCTTATCTTAGCGGCGGACGGGTGAGTAATGCTTAGGAATCTGCCTATTAGTGGGGGACAACATTCCGAAAGGAATGCTAATACCGCATACGTCCTACGGGAGAAAGCAGGGGATCTTCGGACCTTGCGCTAATAGATGAGCCTAAGTCGGATTAGCTAGTTGGTGGGGTAAAGGCCTACCAAGGCGACGATCTGTAGCGGGTCTGAGAGGATGATCCGCCACACTGGGACTGAGACACGGCCCAG	k__Bacteria; p__Proteobacteria; c__Gammaproteobacteria; o__Pseudomonadales; f__Moraxellaceae; g__Acinetobacter; NA	0	0	0	0	0	0	0.00150820861079976	0	0	0	0	0	0	0	0	0	0	0	0	0	0
ATTGAACGCTGGCGGCAGGCCTAACACATGCAAGTCGAGCGGATGAAGGGAGCTTGCTCCCTGATTTAGCGGCGGACGGGTGAGTAATGCCTAGGAATCTGCCTGGTAGTGGGGGATAACGTTCCGAAAGGAACGCTAATACCGCATACGTCCTACGGGAGAAAGCAGGGGACCTTCGGGCCTTGCGCTATCAGATGAGCCTAGGTCGGATTAGCTAGTTGGTGAGGTAATGGCTCACCAAGGCGACGATCCGTAACTGGTCTGAGAGGATGATCAGTCACACTGGAACTGAGACACGGTCCAG	k__Bacteria; p__Proteobacteria; c__Gammaproteobacteria; o__Pseudomonadales; f__Pseudomonadaceae; g__Pseudomonas; NA	0	0	0	0	0	0	0	0	0	0	0.0010075026795284	0	0	0	0	0	0	0	0	0	0
AGCGAACGCTGGCGGCAGGCTTAACACATGCAAGTCGAACGCTCGTCTTCGGACGGGAGTGGCAGACGGGTGAGTAACACGTGGGAACGTACCCTTTGGTTCGGAATAACGCAGGGAAACTTGCGCTAATACCGGATACGCCCTTTTGGGGAAAGGTTTACTGCCGAAGGATCGGCCCGCGTCTGATTAGCTAGTTGGTGGGGTAACGGCCTACCAAGGCGACGATCAGTAGCTGGTCTGAGAGGATGATCAGCCACACTGGGACTGAGACACGGCCCAG	k__Bacteria; p__Proteobacteria; c__Alphaproteobacteria; o__Rhizobiales; f__Beijerinckiaceae; g__Methylobacterium; NA	0	3.78062304667809e-05	0	0	0	0	0	0	0	0	0	0	0	0	0	0	0	0	0	0	0
